# Supplementary material for: Novel Trypanocidal Inhibitors that Block Glycosome Biogenesis by Targeting PEX3–PEX19 Interaction
Source: Frontiers journal article supplement (doi:10.3389/fcell.2021.737159), 2021-12-20
Supplement: Image_2.PDF [file Image_2.PDF]

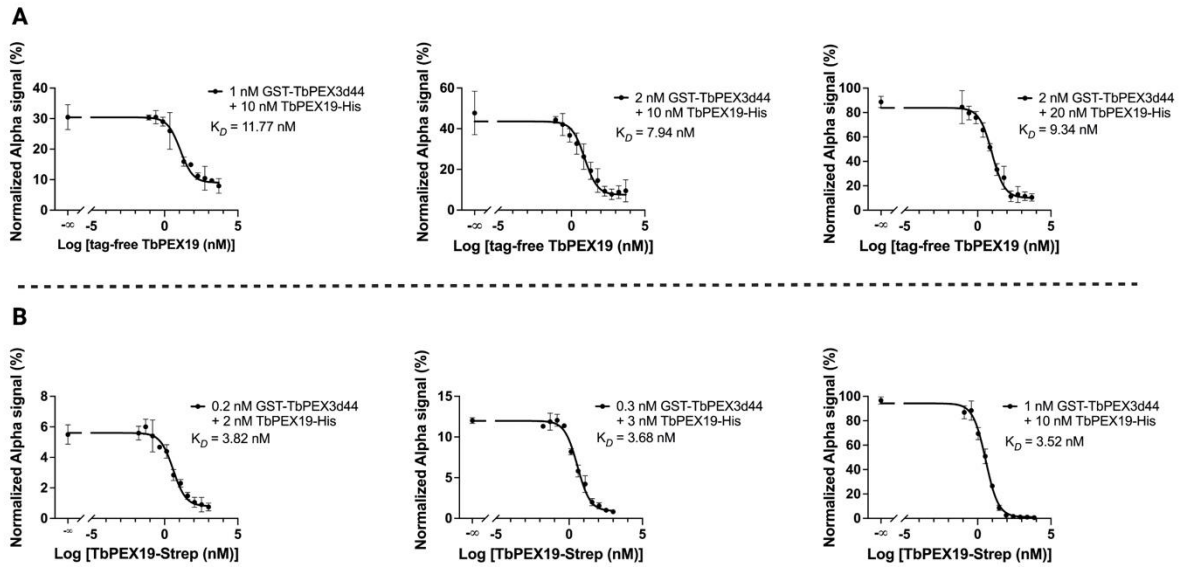

**Supplementary figure 2. Competitive binding assays using tag-free TbPEX19 and TbPEX19-Strep. (A)** GST-TbPEX3 and TbPEX19-His was used in three independent assays in molar ratios of either 1:10 or 1:5 (each with three technical replicates) as indicated. Raw Alpha signal output was normalized for comparison. Tag-free TbPEX19 was titrated (0 – 5  $\mu$ M) and added to the interaction to compete with TbPEX19-His for binding. The competitive curve was fitted using GraphPad and a  $K_D$  of  $9.7 \pm 1.9$  nM was estimated. **(B)** GST-TbPEX3d44 and TbPEX19-His was used for the assays in a molar ratio of 1:10 as indicated. TbPEX19-Strep (0 – 7.2  $\mu$ M) was added to bind GST-TbPEX3d44 and to compete for binding of TbPEX19-His. The  $K_D$  was estimated to be  $3.7 \pm 0.2$  nM.
